# Supplementary material for: Controlled keto–enol tautomerism of coumarin containing β-ketodithioester by its encapsulation in cucurbit[7]uril
Source: Royal Society of Chemistry journal article supplement (doi:10.1039/c7nj03265j), 2017-01-01
Supplement: c7nj03265j1.pdf [file c7nj03265j1.pdf]

## Supporting Information

### **Controlled keto-enol tautomerism of coumarin containing $\beta$ -ketodithioester by its encapsulation in cucurbit[7]uril.**

Margarita E. Aliaga,<sup>\*a</sup> Luis García-Río,<sup>b</sup> Ambar Numi,<sup>a</sup> Alejandra Rodríguez,<sup>a</sup> Sandra Arancibia-Opazo,<sup>a</sup> Angélica Fierro,<sup>a</sup> and Alvaro Cañete.<sup>\*a</sup>

<sup>a</sup>Facultad de Química, Pontificia Universidad Católica de Chile, Casilla 306,  
Santiago 6094411, Chile.

<sup>b</sup>Departamento de Química Física, Centro de Investigación en Química Biológica y Materiales Moleculares (CIQUS), Universidad de Santiago, 15782 Santiago, Spain.

\* Corresponding authors. Tel.: +56-(2)-23544385; Fax: +56-(2)-26864744. E-mail address: [acanetem@uc.cl](mailto:acanetem@uc.cl) (Alvaro Cañete). Tel.: +56-(2)-23547126; Fax: +56-(2)-26864744. E-mail address: [mealiaga@uc.cl](mailto:mealiaga@uc.cl) (Margarita E. Aliaga).

| <b>Contents</b>                                                                                                                                                                                                                                                | <b>Page</b> |
|----------------------------------------------------------------------------------------------------------------------------------------------------------------------------------------------------------------------------------------------------------------|-------------|
| <b>Figure S1A.</b> <sup>1</sup> H NMR spectrum for <b>CAM1</b> alone in DMSO- <i>d</i> <sub>6</sub> .                                                                                                                                                          | S-3         |
| <b>Figure S1B.</b> <sup>1</sup> H NMR spectrum for <b>CAM1</b> alone in CD <sub>3</sub> CN.                                                                                                                                                                    | S-3         |
| <b>Figure. S2.</b> <sup>13</sup> C NMR spectrum for <b>CAM1</b> alone in DMSO- <i>d</i> <sub>6</sub> .                                                                                                                                                         | S-4         |
| <b>Figure S3.</b> HRMS of <b>CAM1</b> (2mM) in water-DMSO (99:1, v/v) solution.                                                                                                                                                                                | S-4         |
| <b>Figure S4A.</b> <sup>1</sup> H NMR spectrum for <b>CAM2</b> alone in DMSO- <i>d</i> <sub>6</sub> .                                                                                                                                                          | S-5         |
| <b>Figure S4B.</b> <sup>1</sup> H NMR spectrum for <b>CAM2</b> alone in CD <sub>3</sub> CN.                                                                                                                                                                    | S-5         |
| <b>Figure S5.</b> <sup>13</sup> C NMR spectrum for <b>CAM2</b> alone in DMSO- <i>d</i> <sub>6</sub> .                                                                                                                                                          | S-6         |
| <b>Figure S6.</b> <sup>13</sup> C NMR-DEPT spectrum for <b>CAM2</b> alone in DMSO- <i>d</i> <sub>6</sub> .                                                                                                                                                     | S-6         |
| <b>Figure S7.</b> COSY spectrum of <b>CAM2</b> alone in DMSO- <i>d</i> <sub>6</sub> .                                                                                                                                                                          | S-7         |
| <b>Figure S8.</b> <sup>1</sup> H-HMQC spectrum of <b>CAM2</b> alone in DMSO- <i>d</i> <sub>6</sub> .                                                                                                                                                           | S-7         |
| <b>Figure S9.</b> <sup>1</sup> H-HMBC spectrum of <b>CAM2</b> alone in DMSO- <i>d</i> <sub>6</sub> .                                                                                                                                                           | S-8         |
| <b>Figure S10.</b> HRMS-ESI of <b>CAM2</b> (2 mM) in water-DMSO (99:1, v/v) solution.                                                                                                                                                                          | S-8         |
| <b>Figure S11.</b> Normalized UV-vis absorption spectra of; A) coumarin-derivative <b>CAM1</b> dye (2 μM) and B) coumarin-derivative dye <b>CAM2</b> (4 μM), in different solvents.                                                                            | S-9         |
| <b>Figure S12.</b> Comparison of partial <sup>1</sup> H NMR spectra for: A) <b>CAM1</b> alone in CD <sub>3</sub> CN/D <sub>2</sub> O and B) <b>CAM1</b> and CB7 (3 eq.).                                                                                       | S-9         |
| <b>Figure S13.</b> Comparison of partial <sup>1</sup> H NMR spectra for: A) <b>CAM1</b> alone in CD <sub>3</sub> CN/D <sub>2</sub> O and B) <b>CAM1</b> and CB7 (3 eq.).                                                                                       | S-10        |
| <b>Figure S14.</b> Comparison of partial <sup>1</sup> H NMR spectra (400 MHz) for: A) Intermediate <b>2</b> alone in CD <sub>3</sub> CN/D <sub>2</sub> O and B) Intermediate <b>2</b> and CB7 (3 eq.).                                                         | S-10        |
| <b>Figure S15.</b> ESI mass spectra of a 1:10 molar ratio in aqueous solution of coumarin-derivative <b>CAM1</b> and CB7, respectively.                                                                                                                        | S-11        |
| <b>Figure S16.</b> Normalized excitation and emission spectra of dyes: A) <b>CAM1</b> and (B) <b>CAM2</b> , in aqueous solutions.                                                                                                                              | S-11        |
| <b>Figure S17.</b> Job plot for the complexes <b>CAM1-CB7</b> and <b>CAM2-CB7</b>                                                                                                                                                                              | S-12        |
| <b>Figure S18.</b> HRMS-ESI of a 1:10 molar ratio in aqueous solution of coumarin-derivative A) <b>CAM1</b> and CB7, and B) <b>CAM2</b> and CB7, respectively.                                                                                                 | S-12        |
| <b>Figure S19.</b> Comparison of partial <sup>1</sup> H NMR spectra (200 MHz) for: A) <b>CAM2</b> alone in CD <sub>3</sub> CN/D <sub>2</sub> O, B) <b>CAM2</b> and CB7 (3 eq.) and C) <b>CAM2</b> and β-CD (3 eq.).                                            | S-13        |
| <b>Figure S20.</b> A) Fluorescence spectra of <b>CAM1</b> with increasing concentrations of CB7. Inset shows the fluorescence titration of <b>CAM1</b> with CB7. B) Determination of the effective binding constant by fitting data to a 1:1 host:guest model. | S-13        |
| <b>Table S1.</b> Binding energy from docking studies for <b>CAM1</b> and <b>CAM2</b> in CB7 and β-CD.                                                                                                                                                          | S-14        |

A)

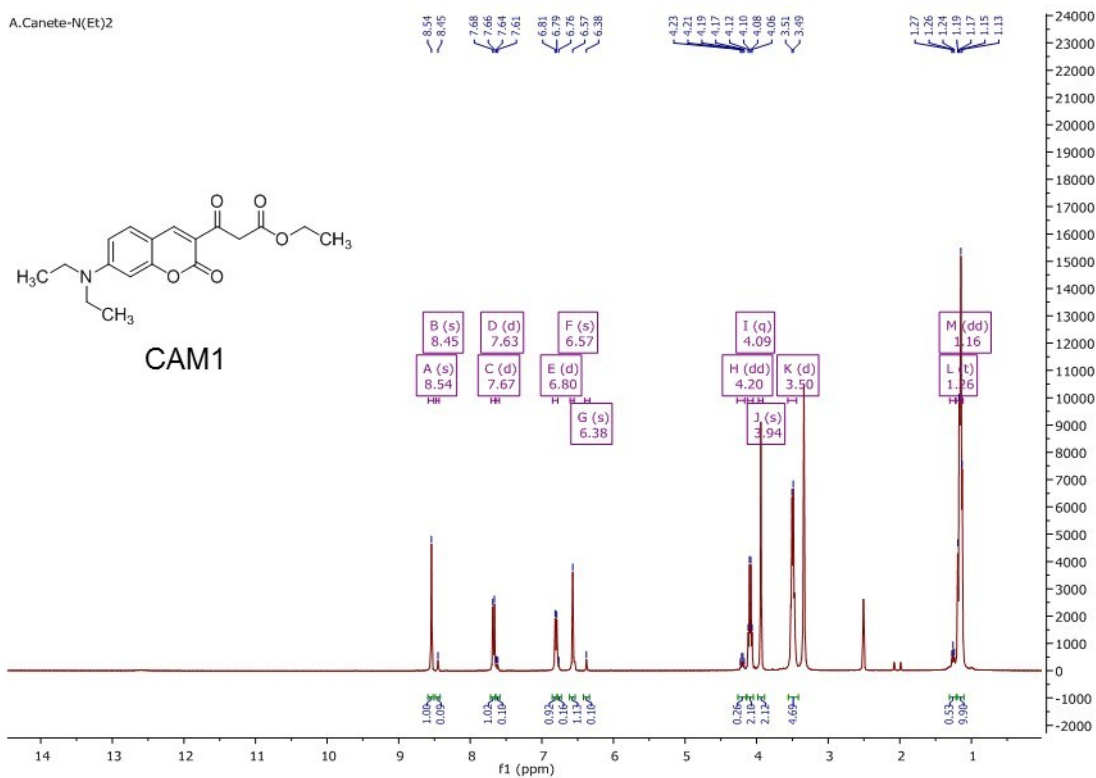

Figure S1A.  $^1\text{H}$  NMR spectrum (400 MHz) for **CAM1** alone in  $\text{DMSO-}d_6$ .

B)

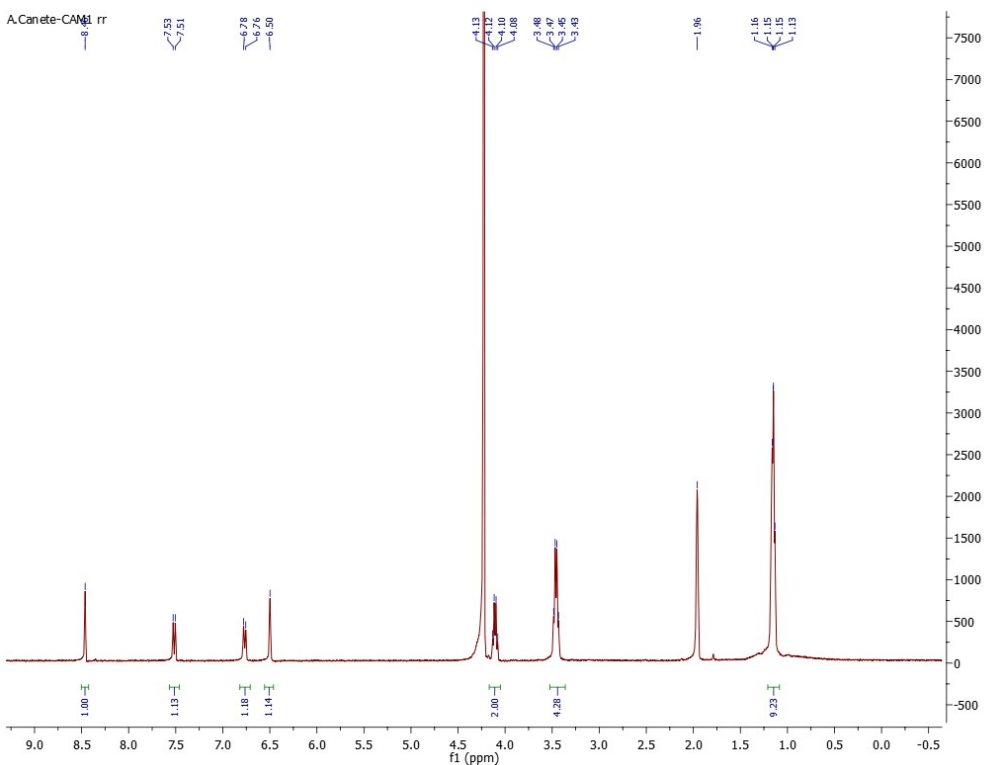

Figure S1B.  $^1\text{H}$  NMR spectrum (400 MHz) for **CAM1** alone in  $\text{CD}_3\text{CN}$ .

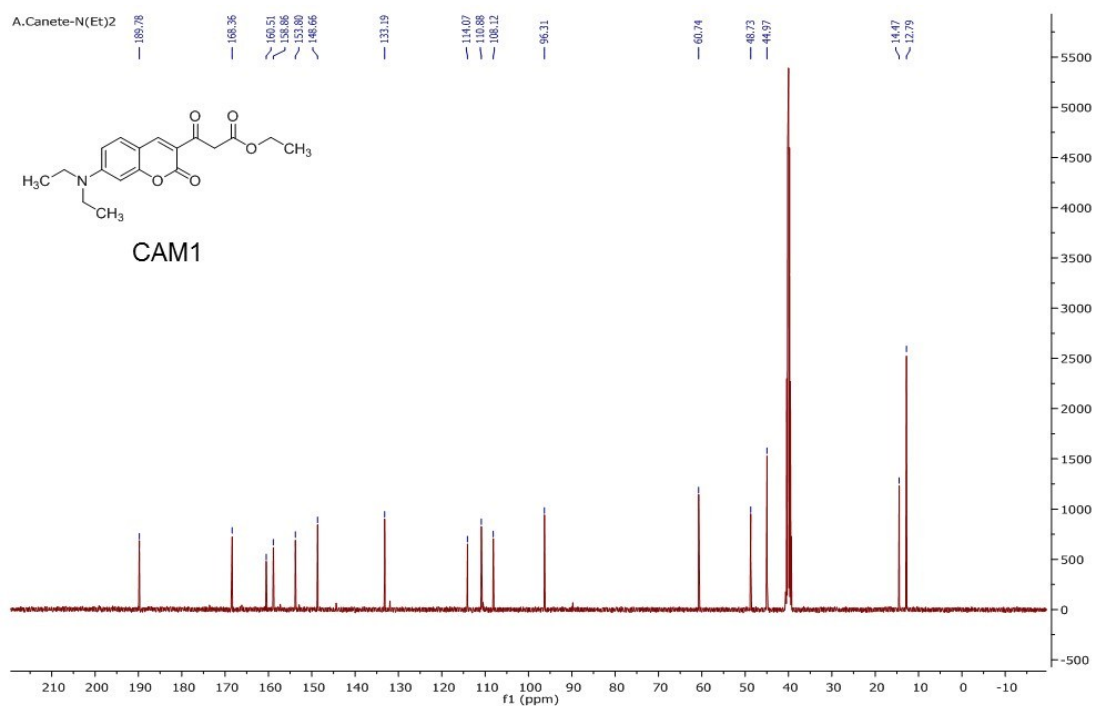

**Figure S2.** <sup>13</sup>C NMR spectrum (400 MHz) for **CAM1** alone in DMSO-*d*<sub>6</sub>.

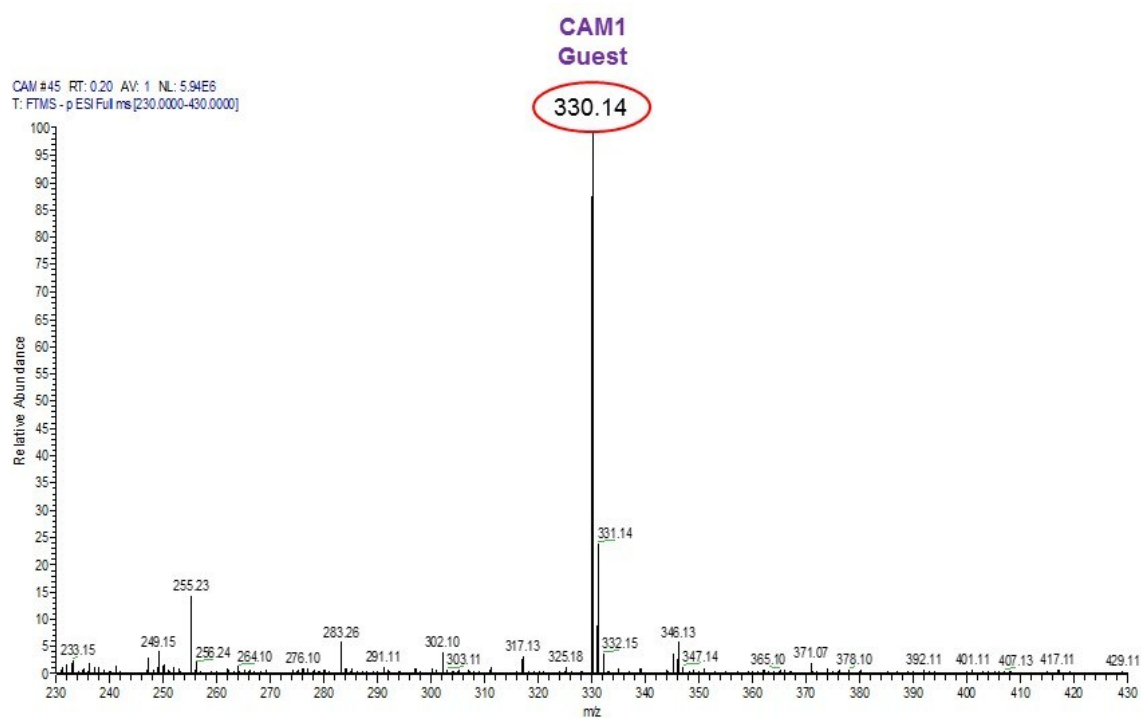

**Figure S3.** HRMS (ESI, negative mode) of **CAM1** (2mM) in water-DMSO (99:1, v/v) solution.

A)

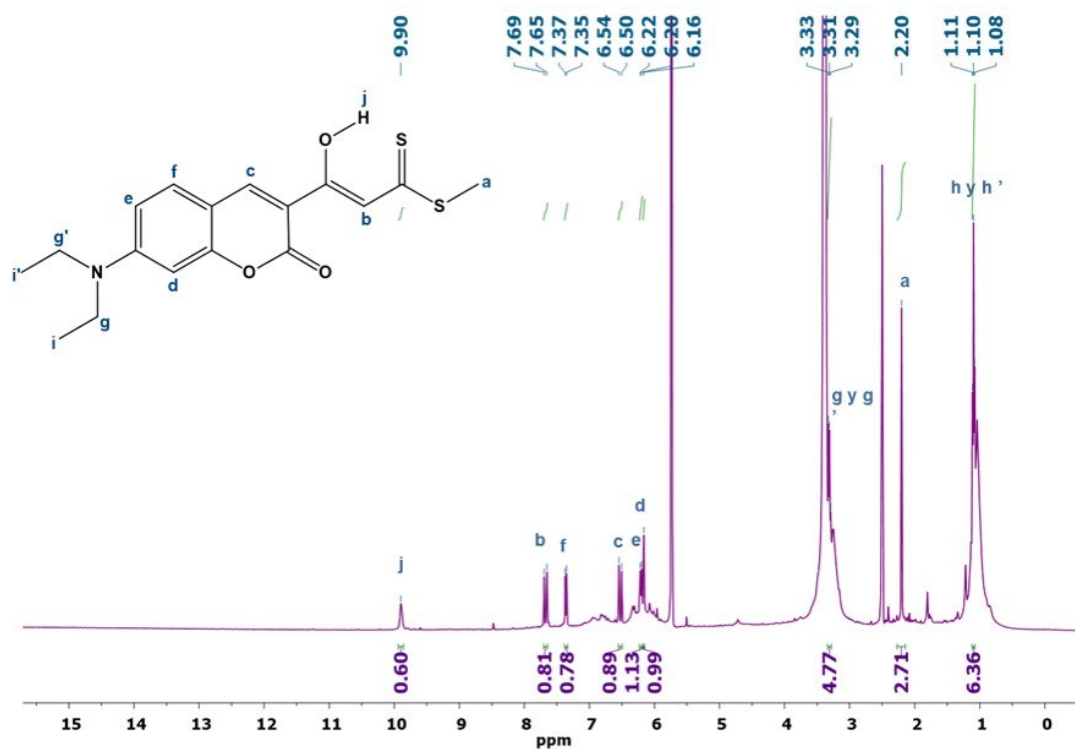

**Figure S4A.**  $^1\text{H}$  NMR spectrum (400 MHz) for **CAM2** alone in  $\text{DMSO-}d_6$ .

B)

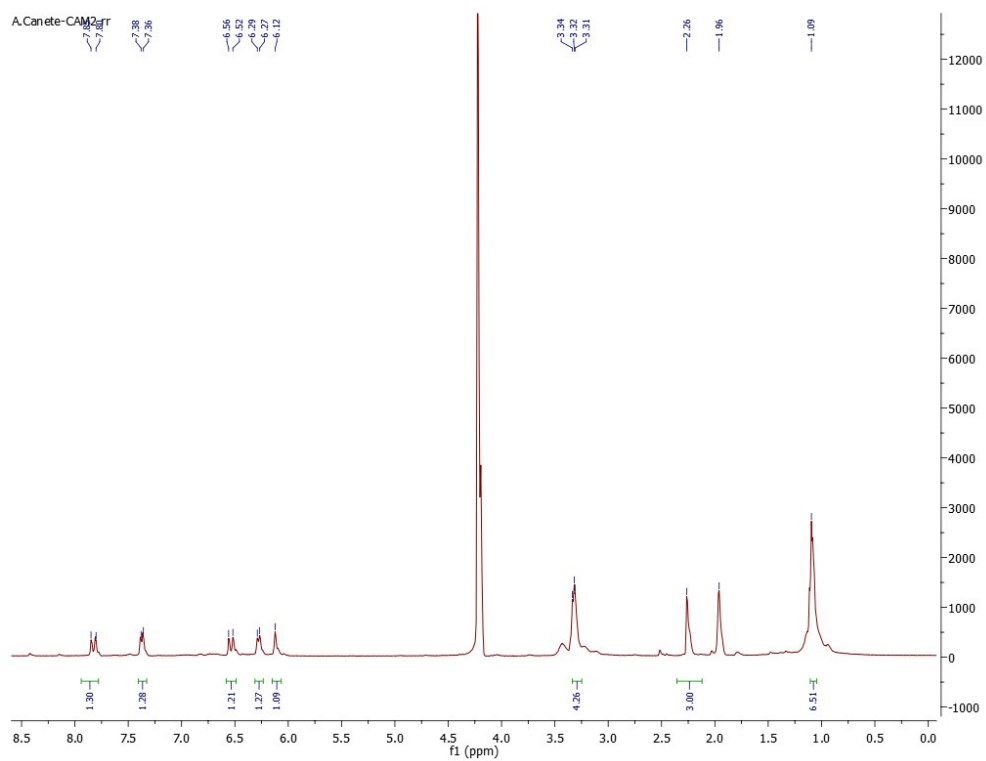

**Figure S4B.**  $^1\text{H}$  NMR spectrum (400 MHz) for **CAM2** alone in  $\text{CD}_3\text{CN}$ .

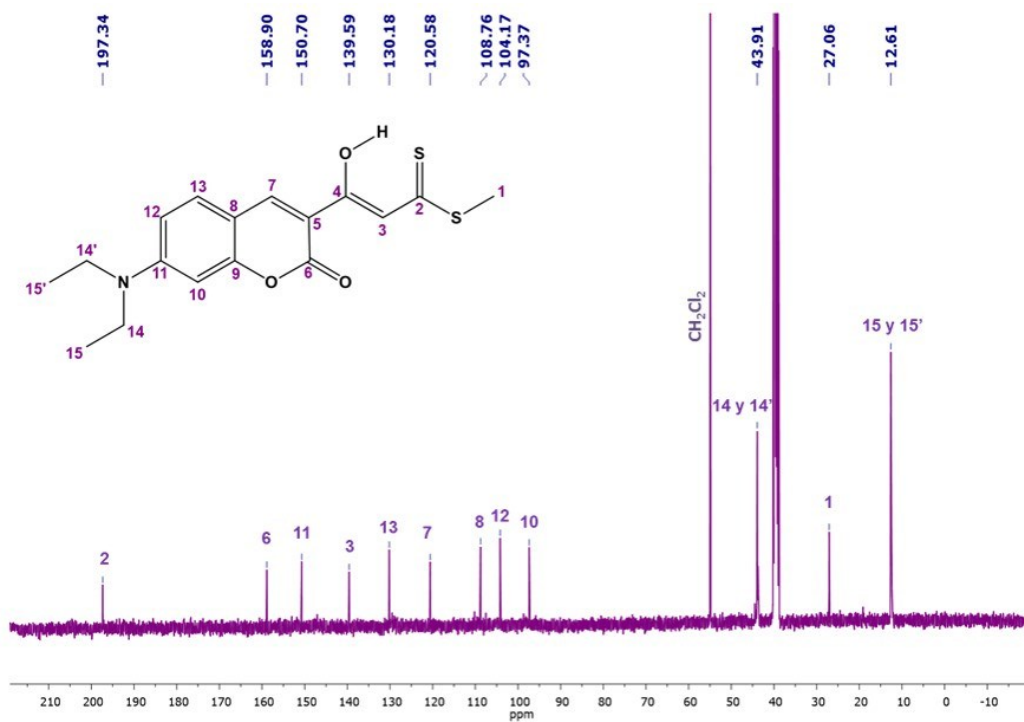

**Figure S5.**  $^{13}\text{C}$  NMR spectrum (400 MHz) for **CAM2** alone in  $\text{DMSO-}d_6$ .

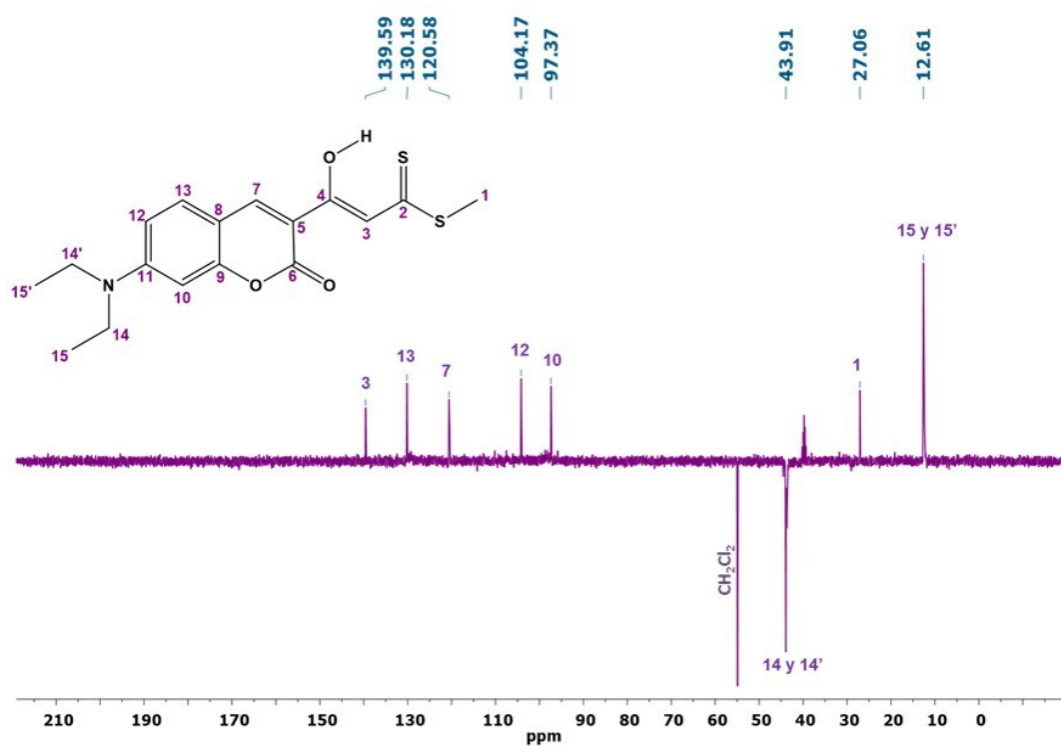

**Figure S6.** <sup>13</sup>C NMR-DEPT spectrum (101 MHz) for **CAM2** alone in DMSO-*d*<sub>6</sub>.



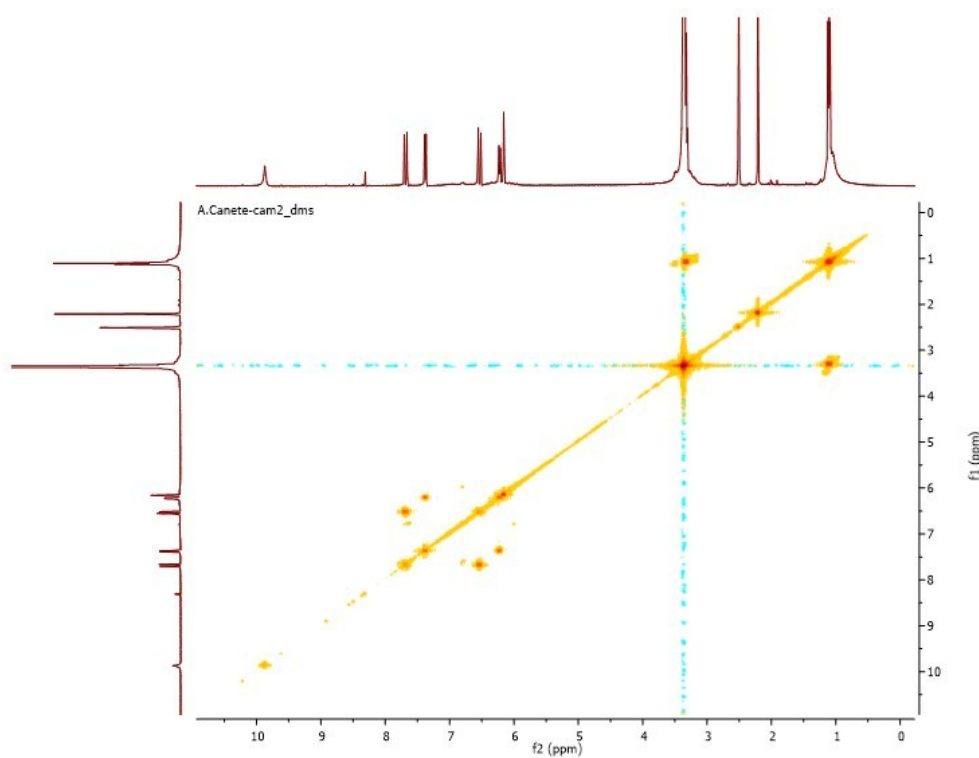

**Figure S7.** COSY spectrum (400 MHz) of **CAM2** alone in DMSO- $d_6$ .

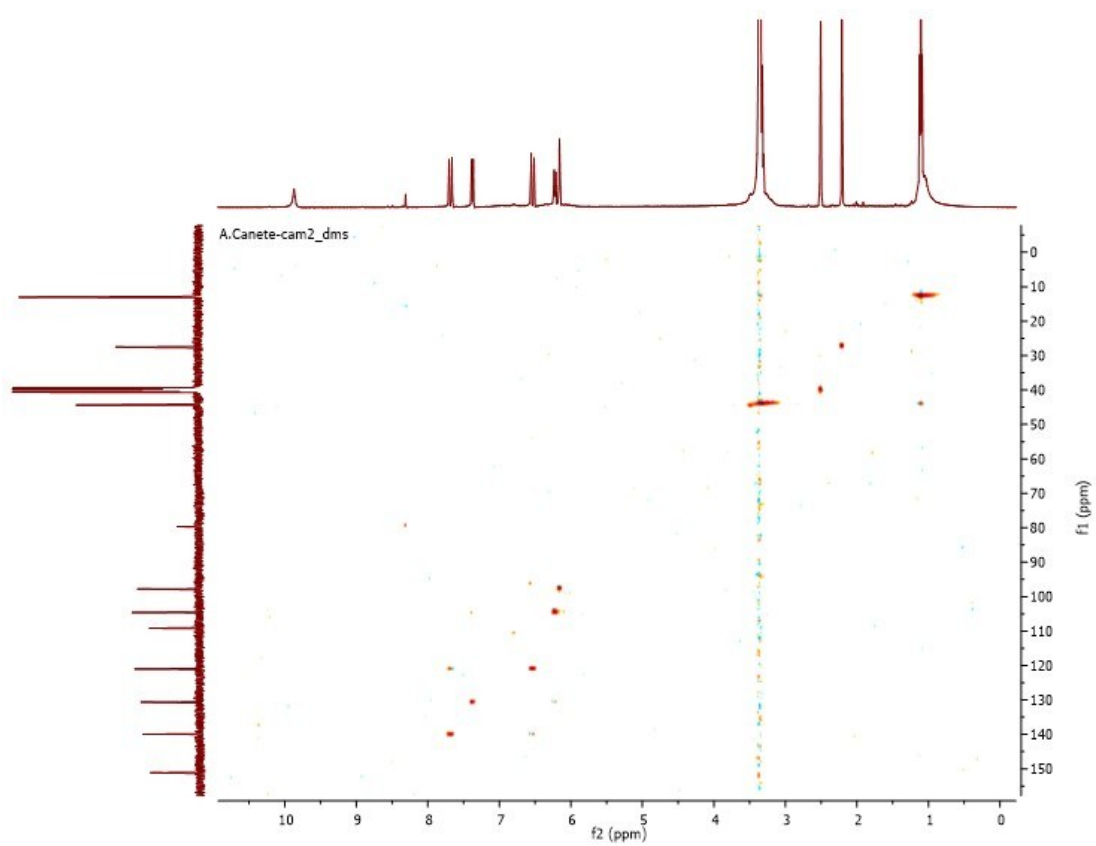

**Figure S8.**  $^1\text{H}$ -HMQC spectrum (400 MHz) of **CAM2** alone in DMSO- $d_6$ .

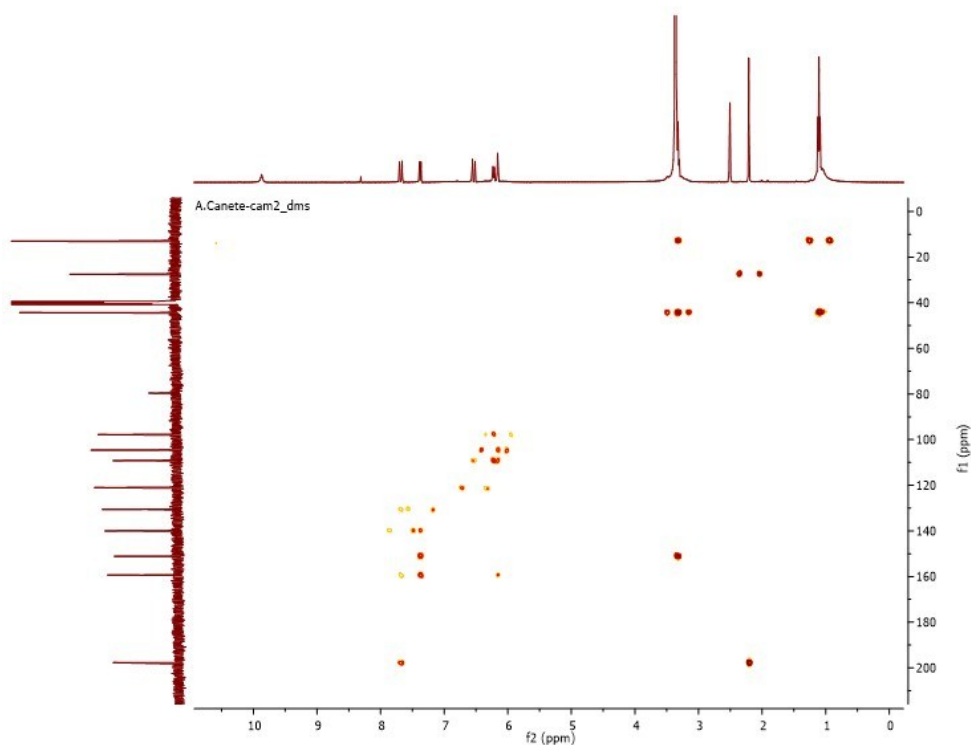

**Figure S9.**  $^1\text{H}$ -HMBC spectrum (400 MHz) of **CAM2** alone in  $\text{DMSO-}d_6$ .

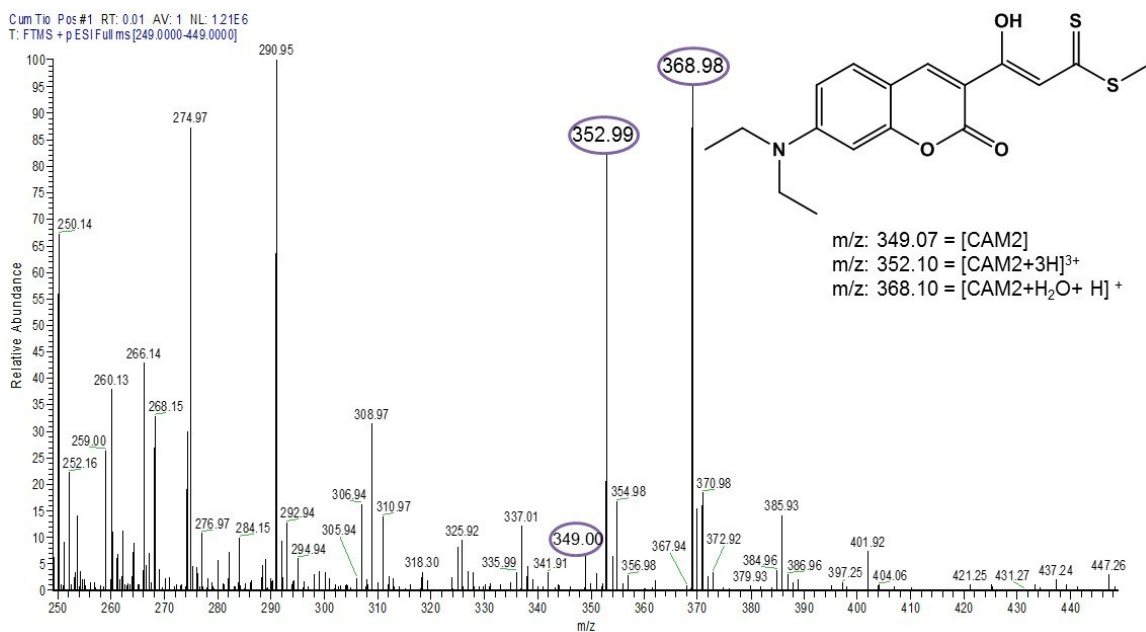

**Figure S10.** HRMS-ESI (positive mode) of **CAM2** (2mM) in water-DMSO (99:1, v/v) solution.

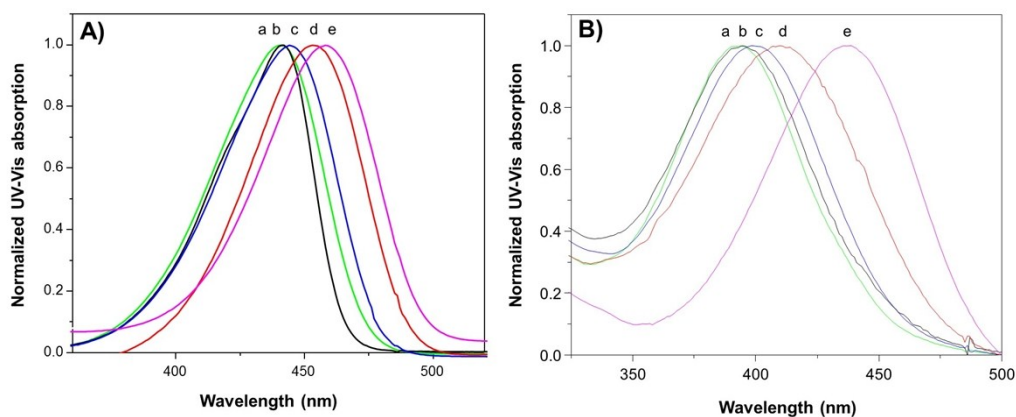

**Figure S11.** Normalized UV-vis absorption spectra of: A) coumarin-derivative **CAM1** dye (2 μM) and B) coumarin-derivative dye **CAM2** (4 μM) in chloroform (a), DMSO (b), ethanol (c), aqueous solution (d) and with CB7 (100 μM) in aqueous solution (e).

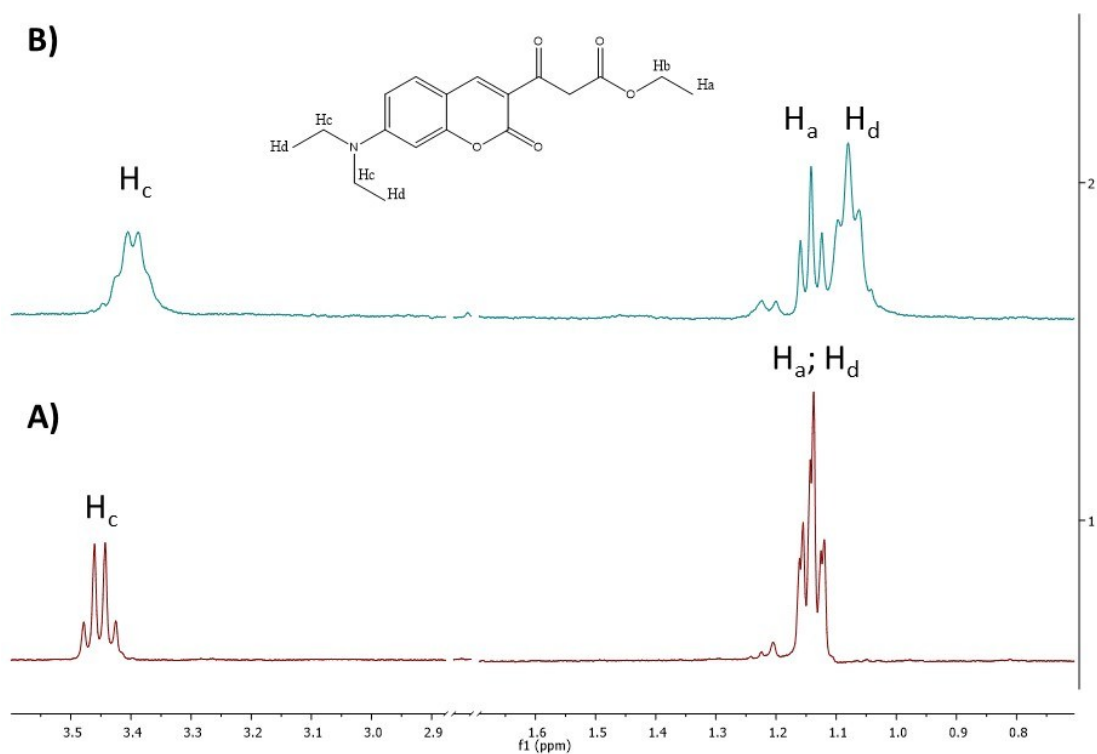

**Figure S12.** Comparison of partial <sup>1</sup>H NMR spectra (400 MHz) for: A) **CAM1** alone in CD<sub>3</sub>CN/D<sub>2</sub>O and B) **CAM1** and CB7 (3 eq.).

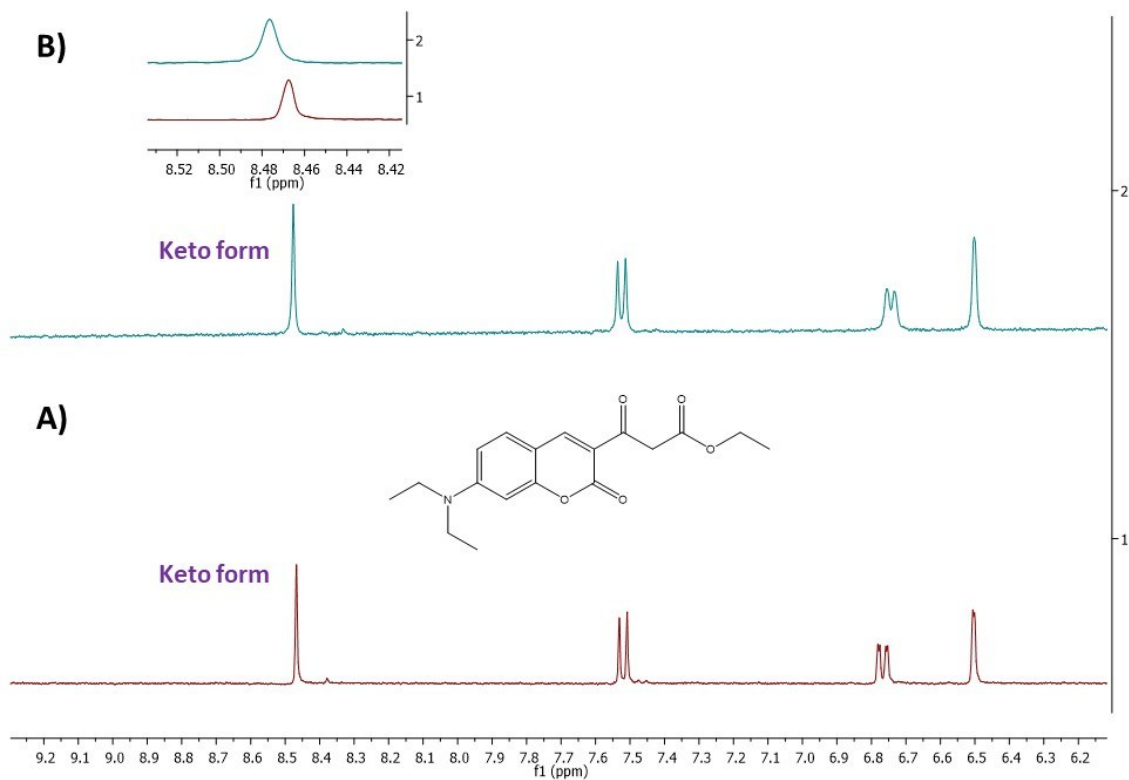

**Figure S13.** Comparison of partial  $^1\text{H}$  NMR spectra (400 MHz) for: A) **CAM1** alone in  $\text{CD}_3\text{CN}/\text{D}_2\text{O}$  and B) **CAM1** and CB7 (3 eq.).

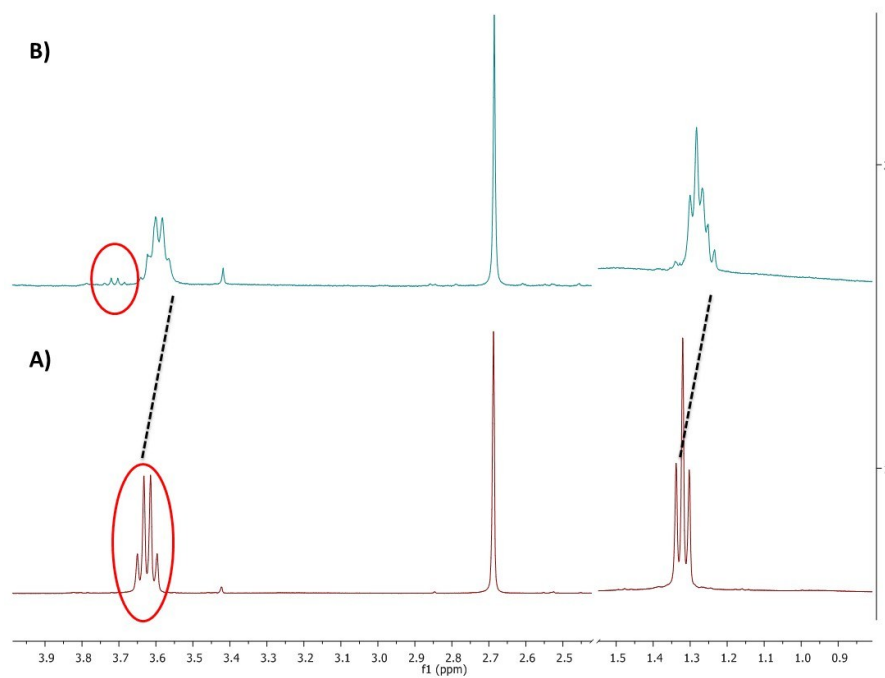

**Figure S14.** Comparison of partial  $^1\text{H}$  NMR spectra (400 MHz) for: A) Intermediate **2** alone in  $\text{CD}_3\text{CN}/\text{D}_2\text{O}$  and B) Intermediate **2** and CB7 (3 eq.).

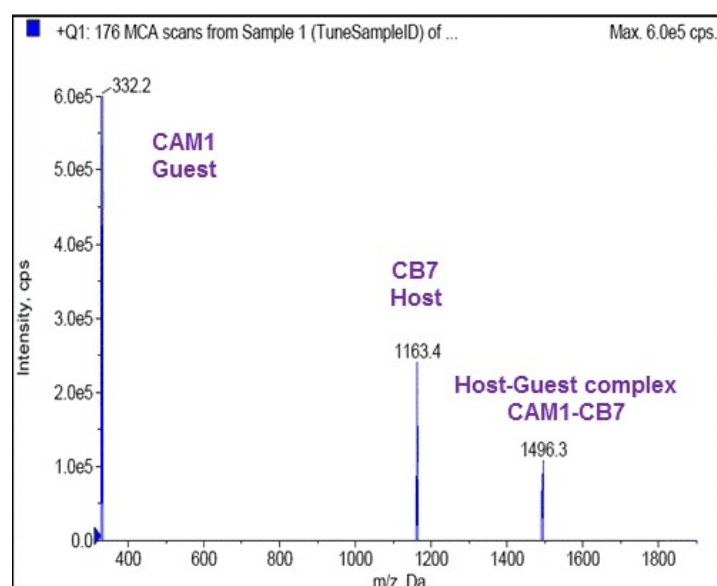

**Figure S15.** ESI mass spectra of a 1:10 molar ratio in aqueous solution of coumarin-derivative **CAM1** and CB7, respectively.

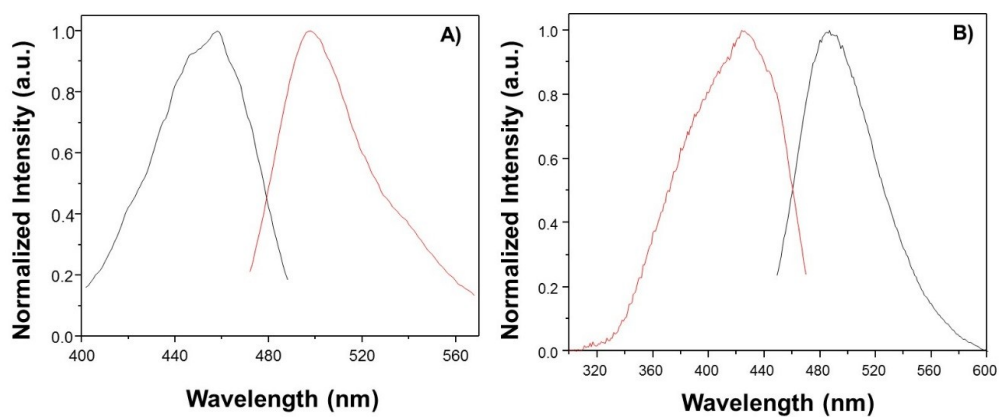

**Figure S16.** Normalized excitation and emission spectra of coumarin-derivative dyes: A) **CAM1** (5  $\mu$ M) and B) **CAM2** (5  $\mu$ M), excitation and emission slits of 5 nm were used. All spectra were carried out in aqueous solutions.

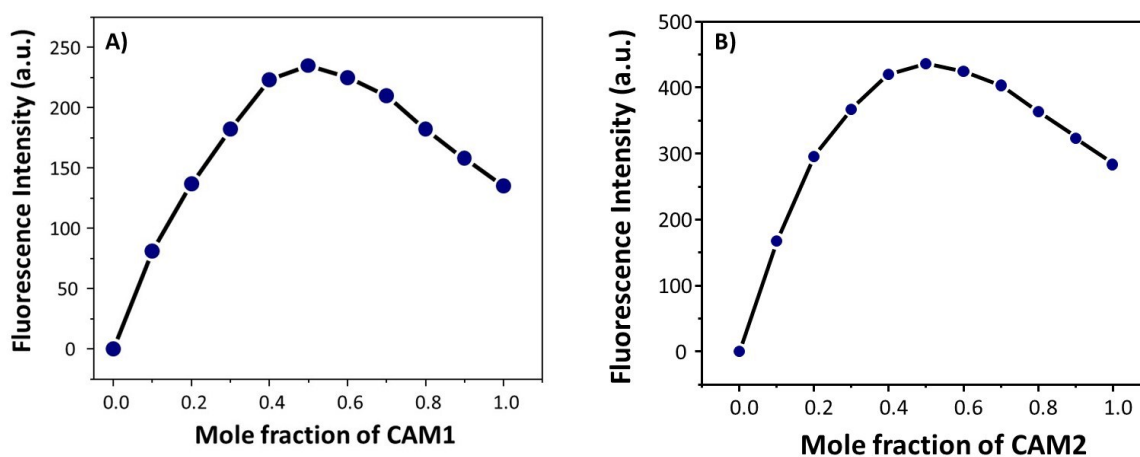

**Figure S17.** Job plot for the complexes **CAM1-CB7** ( $\lambda_{\text{exc}} = 460 \text{ nm}$ ;  $\lambda_{\text{em}} = 500 \text{ nm}$ ) (A) and **CAM2-CB7** (B) ( $\lambda_{\text{exc}} = 420 \text{ nm}$ ;  $\lambda_{\text{em}} = 490 \text{ nm}$ ).

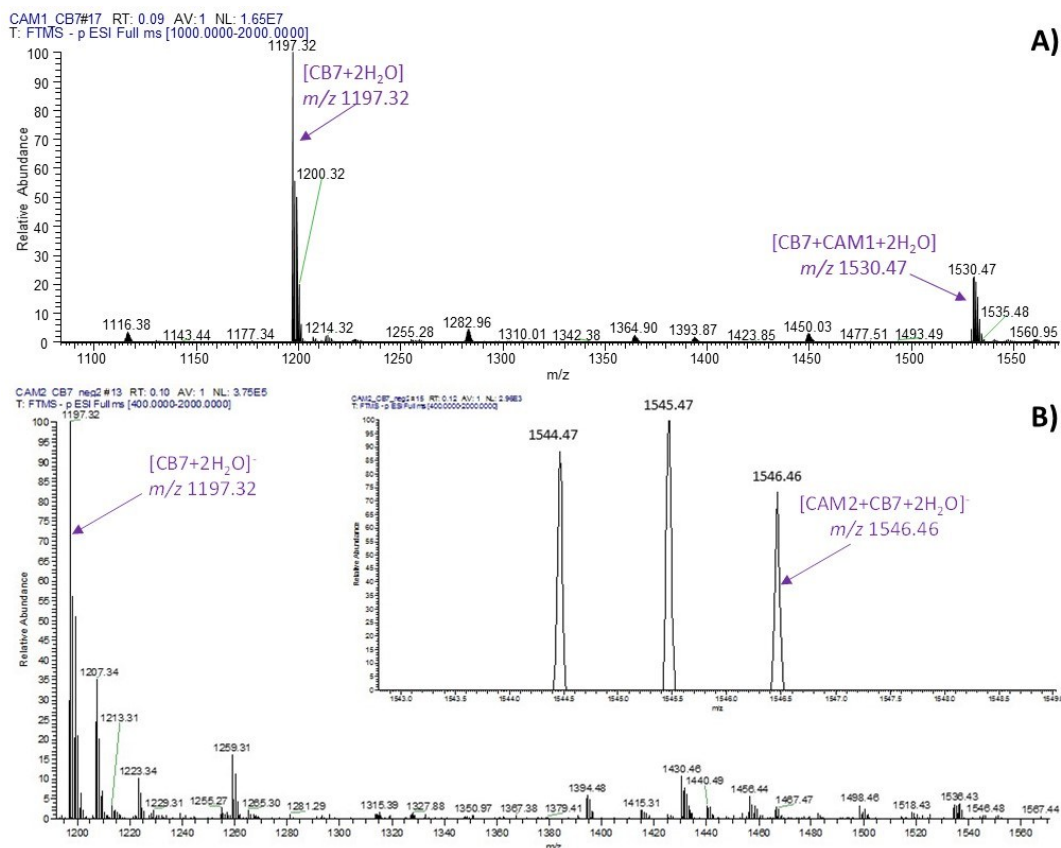

**Figure S18.** HRMS-ESI (negative mode) of a 1:10 molar ratio in aqueous solution of coumarin-derivative A) **CAM1** and CB7, and B) **CAM2** and CB7.

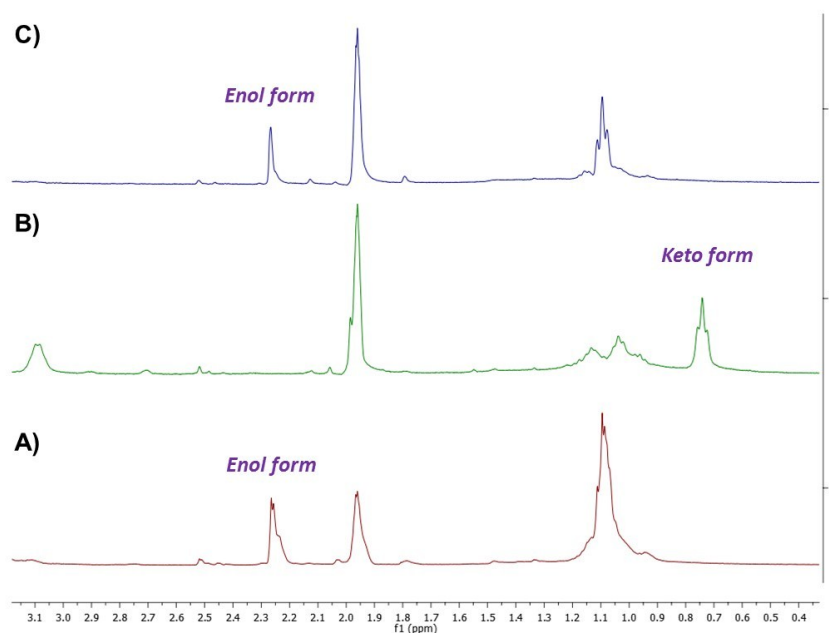

**Figure S19.** Comparison of partial <sup>1</sup>H NMR spectra (400 MHz) for: A) **CAM2** alone in CD<sub>3</sub>CN/D<sub>2</sub>O, B) **CAM2** and CB7 (3 eq.) and C) **CAM2** and β-CD (3 eq.).

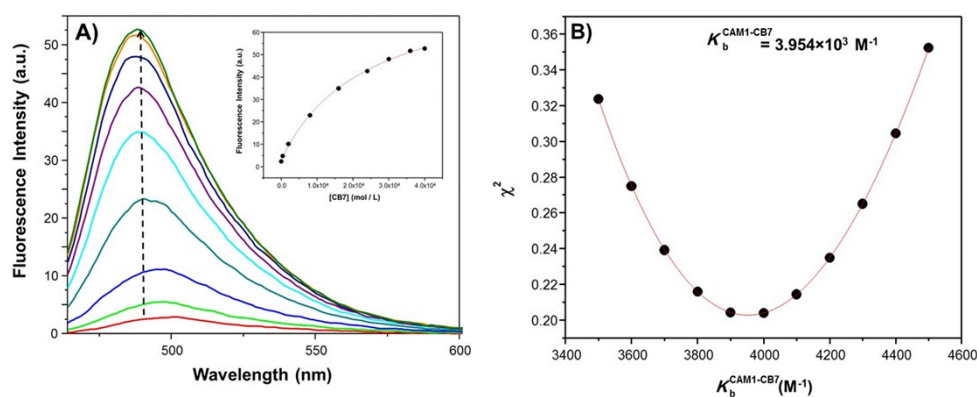

**Figure S20.** A) Fluorescence spectra of the coumarin-derivative **CAM1** (5 μM) with increasing concentrations of CB7 (5-400 μM). Inset shows the fluorescence titration of 5 μM **CAM1** with CB7 in aqueous solution. B) The effective binding constant was determined as  $K_{\text{CAM1CB7}} = 3.95 \times 10^3 \text{ M}^{-1}$  by fitting data to the 1:1 host:guest model. Excitation and emission slits of 5 nm were used.

**Table S1.** Binding energy from docking studies for **CAM1** and **CAM2** in CB7 and  $\beta$ -CD.

| <b>Guest</b> | <b>Binding Energy (kcal/mol)</b> |                              |
|--------------|----------------------------------|------------------------------|
|              | <b>CB7</b>                       | <b><math>\beta</math>-CD</b> |
| <b>CAM1</b>  | -1.2                             | -0.6                         |
| <b>CAM2</b>  | -2.1                             | -1.6                         |
